# Supplementary material for: Mental Health Treatment and Unmet Mental Health Care Need Among Pregnant Women With Major Depressive Episode in the United States
Source: Atypon-hosted journal article supplement (doi:10.1176/appi.ps.201800433), 2019-04-10
Supplement: appi.ps.201800433.ds001.pdf [file appi.ps.201800433.ds001.pdf]

**Demographic Characteristics of Women with Major Depressive Episode and Unmet Mental Health Care Need by Pregnancy Status**

|                                          | <b>Pregnant</b>             |                       | <b>Non-Pregnant</b>         |                       |
|------------------------------------------|-----------------------------|-----------------------|-----------------------------|-----------------------|
|                                          | <b>Weighted Proportions</b> | <b>Standard Error</b> | <b>Weighted Proportions</b> | <b>Standard Error</b> |
| <b>Age</b>                               | 27                          | 0.67                  | 29                          | 0.16                  |
| <b>Race</b>                              |                             |                       |                             |                       |
| Non-Hispanic White                       | 0.66                        | 0.05                  | 0.71                        | 0.01                  |
| Non-Hispanic Black                       | 0.11                        | 0.04                  | 0.1                         | 0.01                  |
| Hispanic                                 | 0.17                        | 0.04                  | 0.12                        | 0.01                  |
| Non-Hispanic Other                       | 0.06                        | 0.02                  | 0.07                        | 0.01                  |
| <b>Education</b>                         |                             |                       |                             |                       |
| High School                              | 0.21                        | 0.07                  | 0.19                        | 0.01                  |
| Some College                             | 0.4                         | 0.09                  | 0.46                        | 0.02                  |
| College                                  | 0.21                        | 0.05                  | 0.27                        | 0.01                  |
| < High School                            | 0.18                        | 0.07                  | 0.08                        | 0.01                  |
| <b>Employment Status</b>                 |                             |                       |                             |                       |
| Full time                                | 0.23                        | 0.07                  | 0.43                        | 0.01                  |
| Part-time                                | 0.17                        | 0.06                  | 0.24                        | 0.01                  |
| Looking/Layoff/Unemployed                | 0.15                        | 0.06                  | 0.07                        | 0.01                  |
| Other including not in the labor force   | 0.45                        | 0.09                  | 0.26                        | 0.01                  |
| <b>Total Family Income</b>               |                             |                       |                             |                       |
| < \$20,000                               | 0.4                         | 0.05                  | 0.29                        | 0.01                  |
| \$20,000 – \$49,999                      | 0.21                        | 0.04                  | 0.34                        | 0.01                  |
| \$50,000 – \$74,999                      | 0.18                        | 0.05                  | 0.15                        | 0.01                  |
| ≥ \$75,000                               | 0.21                        | 0.04                  | 0.22                        | 0.01                  |
| <b>Married</b>                           | 0.34                        | 0.05                  | 0.22                        | 0.01                  |
| <b>Any Children &lt; 18 years of age</b> | 0.5                         | 0.04                  | 0.41                        | 0.01                  |
| <b>Health Insurance</b>                  |                             |                       |                             |                       |

|                                                          |      |      |      |      |
|----------------------------------------------------------|------|------|------|------|
| Private Insurance                                        | 0.37 | 0.06 | 0.5  | 0.01 |
| Public Insurance                                         | 0.44 | 0.05 | 0.22 | 0.01 |
| Other Insurance                                          | 0.05 | 0.02 | 0.06 | 0.01 |
| Uninsured                                                | 0.14 | 0.04 | 0.22 | 0.01 |
| <b>Self-Rated Physical Health</b>                        |      |      |      |      |
| Excellent                                                | 0.09 | 0.03 | 0.11 | 0.01 |
| Very Good                                                | 0.37 | 0.03 | 0.34 | 0.01 |
| Good                                                     | 0.39 | 0.03 | 0.33 | 0.01 |
| Fair/Poor                                                | 0.15 | 0.04 | 0.22 | 0.01 |
| <b>Substance Use</b>                                     |      |      |      |      |
| Prescription Pain Reliever<br>Misuse in the past 30 days | 0.06 | 0.03 | 0.07 | 0.01 |
| Marijuana Use in the past 30<br>days                     | 0.17 | 0.04 | 0.12 | 0.01 |
| Alcohol Use in the Past 30<br>days                       | 0.23 | 0.03 | 0.65 | 0.01 |
| <b>County Metro/Nonmetro<br/>Status</b>                  |      |      |      |      |
| Large Metro                                              | 0.46 | 0.04 | 0.52 | 0.01 |
| Small Metro                                              | 0.32 | 0.04 | 0.34 | 0.01 |
| Nonmetro                                                 | 0.22 | 0.04 | 0.14 | 0.01 |
